# Supplementary material for: GAN-argcPredNet v2.0: A Radar Echo Extrapolation Model based on Spatiotemporal Process Intensification
Source: Copernicus journal article supplement (doi:10.5194/gmd-2022-265), 2023-01-16
Supplement: Supplementary file 1 [file gmd-2022-265-supplement-version2.pdf]

Supplement for

## **GAN-argcPredNet v2.0: A Radar Echo Extrapolation Model based on Spatiotemporal Process Enhancement**

Kun Zheng<sup>1\*</sup>, Qiya Tan<sup>1\*</sup>, Huihua Ruan<sup>2</sup>, Jinbiao Zhang<sup>2</sup>, Cong Luo<sup>3</sup>, Siyu Tang<sup>3</sup>, Yunlei Yi<sup>4</sup>, Yugang Tian<sup>1</sup>, Jianmei Cheng<sup>5</sup>

<sup>1</sup>School of Geography and Information Engineering, China University of Geosciences, Wuhan, 430074, China

<sup>2</sup>Guangdong Meteorological Observation Data Center, Guangzhou, 510080, China

<sup>3</sup>Guangdong Meteorological Observatory, Guangzhou, 510080, China

<sup>4</sup>Wuhan Zhaotu Technology Co. Ltd., Wuhan, 430074, China

<sup>5</sup>School of Environmental Studies, China University of Geosciences, Wuhan, 430074, China

\*These authors have contributed equally to this work

*Correspondence to:* Kun Zheng (ZhengK@cug.edu.cn); Huihua Ruan (ruanhuihua@163.com)

**This PDF file includes:**

Table S1-8

**Table S1: This is the hyperparameters of ConvLSTM and ConvGRU. The batch size of training is 10.**

| Model    | Name           | Kernel size | Stride | Padding | Hidden states |
|----------|----------------|-------------|--------|---------|---------------|
| ConvLSTM | ConvLSTM layer | 5×5         | 1×1    | 2×2     | (64, 64, 128) |
| ConvGRU  | ConvGRU layer  | 5×5         | 1×1    | 2×2     | (64, 64, 128) |

**Table S2: This is the hyperparameters of the encoder module in the GA-ConvGRU generator. The batch size of training is 10.**

| Model                                   | Name        | Kernel size | Stride | Padding | Filter |
|-----------------------------------------|-------------|-------------|--------|---------|--------|
| GA-ConvGRU<br>(Encoder in<br>Generator) | GRU1_i2h    | 3×3         | 1×1    | 1×1     | 64     |
|                                         | GRU1_h2h    | 5×5         | 1×1    | 2×2     | 64     |
|                                         | Downsample1 | 7×7         | 3×3    | 1×1     | 64     |
|                                         | GRU2_i2h    | 3×3         | 1×1    | 1×1     | 192    |
|                                         | GRU2_h2h    | 5×5         | 1×1    | 2×2     | 192    |
|                                         | Downsample2 | 5×5         | 3×3    | 1×1     | 192    |
|                                         | GRU3_i2h    | 3×3         | 1×1    | 1×1     | 192    |
|                                         | GRU3_h2h    | 3×3         | 1×1    | 1×1     | 192    |

**Table S3: This is the hyperparameters of the decoder module in the GA-ConvGRU generator.**

| Model                                   | Name      | Kernel size | Stride | Padding | Filter |
|-----------------------------------------|-----------|-------------|--------|---------|--------|
| GA-ConvGRU<br>(Decoder in<br>Generator) | GRU3_i2h  | 3×3         | 1×1    | 1×1     | 192    |
|                                         | GRU3_h2h  | 3×3         | 1×1    | 1×1     | 192    |
|                                         | Upsample2 | 5×5         | 3×3    | 1×1     | 192    |
|                                         | GRU2_i2h  | 3×3         | 1×1    | 1×1     | 192    |
|                                         | GRU2_h2h  | 5×5         | 1×1    | 2×2     | 192    |
|                                         | Upsample1 | 7×7         | 3×3    | 1×1     | 192    |
|                                         | GRU1_i2h  | 3×3         | 1×1    | 1×1     | 64     |
|                                         | GRU1_h2h  | 5×5         | 1×1    | 2×2     | 64     |

**Table S4: This is the hyperparameters of the GA-ConvGRU discriminator.**

| Model                         | Name          | Kernel size | Stride | Padding | Filter |
|-------------------------------|---------------|-------------|--------|---------|--------|
| GA-ConvGRU<br>(Discriminator) | Convolution_1 | 7×7         | 5×5    | 1×1     | 32     |
|                               | Convolution_2 | 5×5         | 3×3    | 1×1     | 64     |
|                               | Convolution_3 | 4×4         | 4×4    | 2×2     | 128    |
|                               | Convolution_4 | 4×4         | 4×4    | 0×0     | 256    |
|                               | Convolution_5 | 4×4         | -      | -       | 1      |

**Table S5: This is the hyperparameters of the GAN-argcPredNet v1.0 generator. The batch size of training is 10.**

| Model                                   | Components         | Name              | Kernel size | Padding | Filter             |
|-----------------------------------------|--------------------|-------------------|-------------|---------|--------------------|
| GAN-<br>argcPredNet v1.0<br>(Generator) | Module $A_l$       | Convolution layer | 3×3         | 1×1     | (1, 128, 128, 256) |
|                                         |                    | Maxpool           | 3×3         | 0×0     | -                  |
|                                         | Module $\hat{A}_l$ | Convolution layer | 3×3         | 1×1     | (1, 128, 128, 256) |
|                                         | Module $R_l$       | Upsample          | 3×3         | -       | -                  |
|                                         |                    | argcLSTM          | 3×3         | 1×1     | (1, 128, 128, 256) |

**Table S6: This is the hyperparameters of the GAN-argcPredNet v1.0 discriminator.**

| Model                                   | Name          | Kernel size | Stride | Padding | Filter |
|-----------------------------------------|---------------|-------------|--------|---------|--------|
| GAN-argcPredNet v1.0<br>(Discriminator) | Convolution_1 | 3×3         | 2×2    | 1×1     | 32     |
|                                         | Convolution_2 | 3×3         | 2×2    | 1×1     | 64     |
|                                         | Convolution_3 | 3×3         | 2×2    | 1×1     | 128    |
|                                         | Convolution_4 | 3×3         | 2×2    | 1×1     | 256    |

**Table S7: This is the hyperparameters of the GAN-argcPredNet v2.0 generator. The batch size of training is 10.**

| Model                                   | Components         | Name              | Kernel size | Padding            | Filter             |
|-----------------------------------------|--------------------|-------------------|-------------|--------------------|--------------------|
| GAN-<br>argcPredNet v2.0<br>(Generator) | STIC Attention     | Convolution layer | 7×7×5       | 3×3×2              | 1                  |
|                                         | Module $A_l$       | Convolution layer | 3×3         | 1×1                | (1, 128, 128, 256) |
|                                         |                    | Maxpool           | 3×3         | 0×0                | -                  |
|                                         | Module $\hat{A}_l$ | Convolution layer | 3×3         | 1×1                | (1, 128, 128, 256) |
|                                         | Module $R_l$       | Upsample          | 3×3         | -                  | -                  |
| argcLSTM                                |                    | 3×3               | 1×1         | (1, 128, 128, 256) |                    |

**Table S8: This is the hyperparameters of the GAN-argcPredNet v2.0 discriminator.**

| Model                                   | Name                                      | Kernel size/Size | Stride | Padding | Filter |
|-----------------------------------------|-------------------------------------------|------------------|--------|---------|--------|
| GAN-argcPredNet v2.0<br>(Discriminator) | Compression Ratio of<br>Channel Attention | 8                | -      | -       | -      |
|                                         | Convolution_1                             | 3×3              | 2×2    | 1×1     | 32     |
|                                         | Convolution_2                             | 3×3              | 2×2    | 1×1     | 64     |
|                                         | Convolution_3                             | 3×3              | 2×2    | 1×1     | 128    |
|                                         | Convolution_4                             | 3×3              | 2×2    | 1×1     | 256    |
